# Supplementary material
Source: HighWire-hosted journal article supplement (https://thorax.bmj.com/content/76/10/1040)
Supplement: inline-supplementary-material-3 [file inline-supplementary-material-3.pdf]

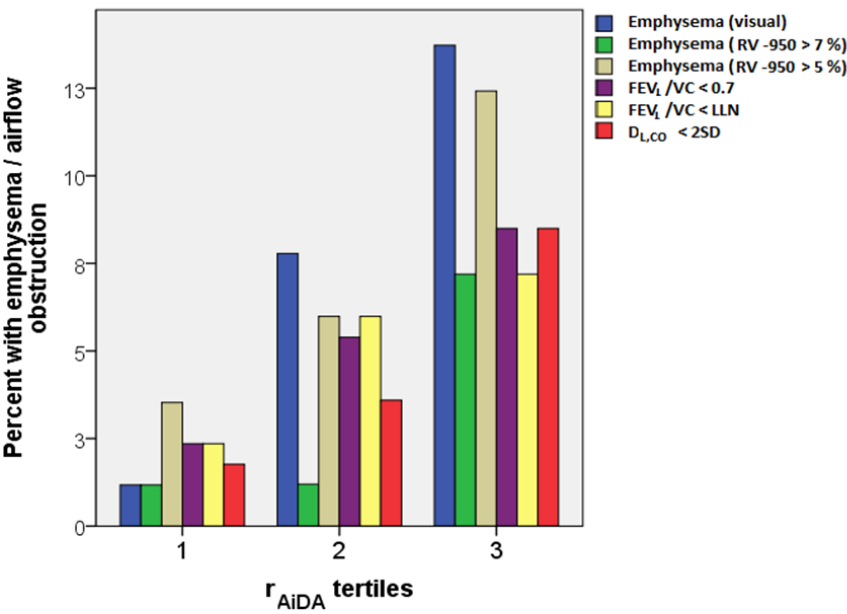

**Online Supplement 4: The percentage of subjects with different emphysema and airflow obstruction indices and  $D_{LCO} < 2\text{ SD}$ .**  
The subjects are divided into tertiles according to increasing  $r_{AiDA}$  values. For each variable, emphysema or outflow obstruction is considered either present or absent. The percentage of present findings per  $r_{AiDA}$  tertile are given.  
 $D_{LCO}$  = diffusing capacity for carbon monoxide, SD = standard deviation, RV -950 = percent of voxels with an attenuation value below -950 Hounsfield Units, FEV<sub>1</sub> = forced expiratory flow in one second, VC = vital capacity, LLN = lower limit of normal,  $r_{AiDA}$  = distal airspace radius measured using Airspace Dimension Assessment with nanoparticles
