# Supplementary material
Source: HighWire-hosted journal article supplement (https://thorax.bmj.com/content/76/10/1040)
Supplement: inline-supplementary-material-5 [file inline-supplementary-material-5.pdf]

Online Supplement 5: Distal airspace diameter measured by different methods

| STUDY             | Method              | Site of measurement | Number of subjects                                | Average diameter, non-emphysematous lung | Average diameter, emphysematous lung   | Comment                |
|-------------------|---------------------|---------------------|---------------------------------------------------|------------------------------------------|----------------------------------------|------------------------|
| Tanabe 2017       | Micro-CT            | Lm                  | Controls N = 7<br>CLE N = 6<br>PLE N = 7          | 336 ± 37 µm                              | CLE: 766 ± 259 µm<br>PLE: 698 ± 240 µm |                        |
| Woods 2006        | <sup>3</sup> He MRI | Lm                  | Controls N = 6<br>COPD N = 6                      | 200 µm                                   | 410 µm                                 | No SD given.           |
| Kohlhauf 1999     | ADAM                | Distal airspaces    | Non-emphysematous N = 30<br>Emphysematous N = 20  | 330 ± 100 µm                             | 840 ± 530 µm                           |                        |
| The present study | AiDA                | Distal airspaces    | Non-emphysematous N = 563<br>Emphysematous N = 47 | 582 ± 72 µm                              | 652 ± 96 µm                            | Diameter = 2 x radius. |

CT = computed tomography, CLE = centrilobular emphysema, PLE = panlobular emphysema, <sup>3</sup>He MRI = hyperpolarised helium magnetic resonance imaging, Lm = mean linear intercept, a measure of alveolar/acinar structures, ADAM = aerosol derived airway morphometry, AiDA = airspace dimension assessment with nanoparticles
